# Supplementary material for: Mapping of transcription start sites of human retina expressed genes
Source: PubMed Central journal article supplement (PMC1802077; doi:10.1186/1471-2164-8-42), 2007-02-07

# *ELOVL5*

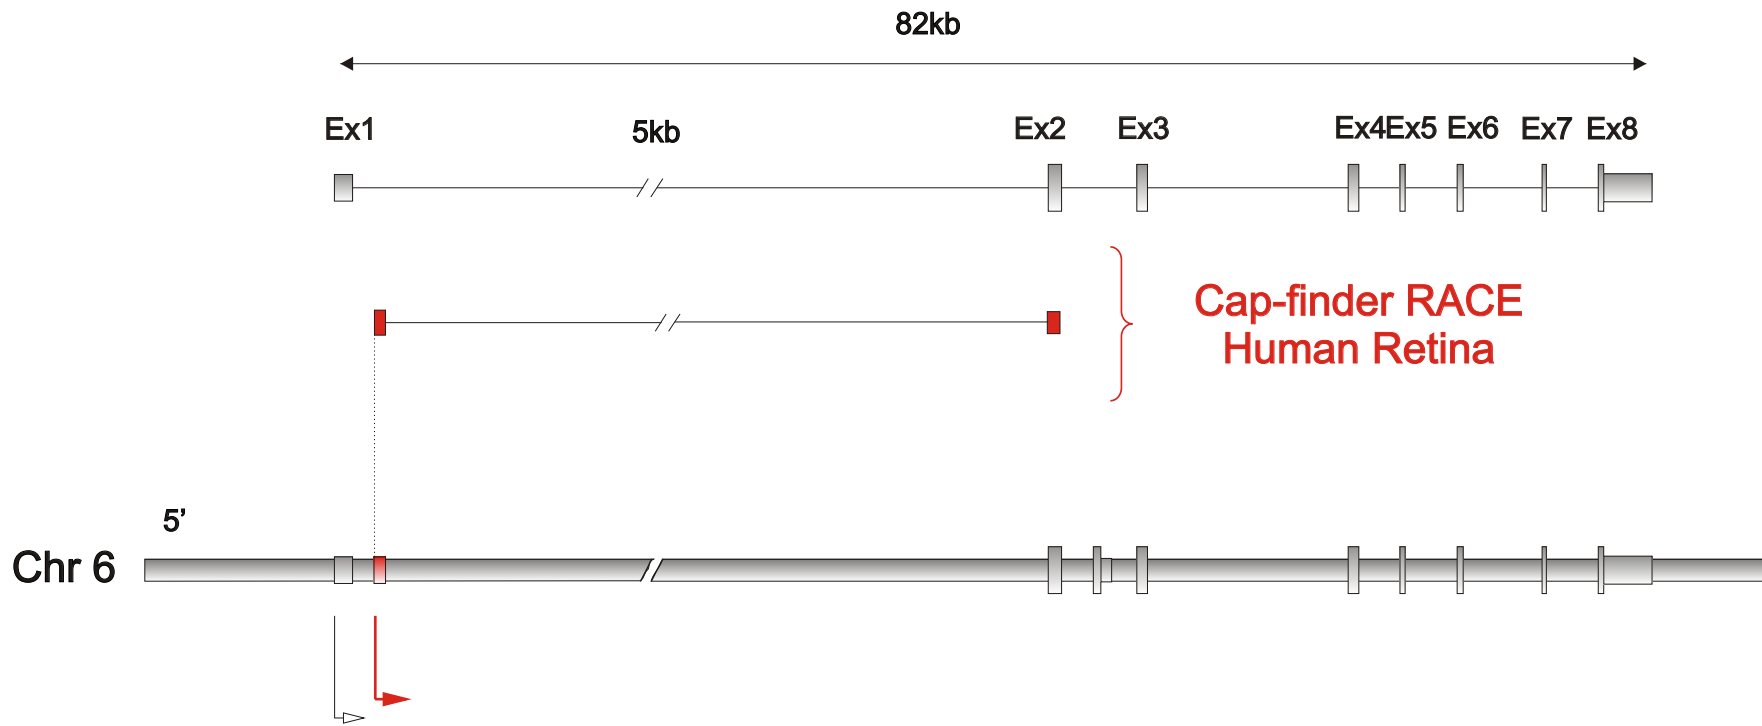

Supplement: 1471-2164-8-42-S3.pdf [file 1471-2164-8-42-S3.pdf]
