# Supplementary material for: Mapping of transcription start sites of human retina expressed genes
Source: PubMed Central journal article supplement (PMC1802077; doi:10.1186/1471-2164-8-42), 2007-02-07

# KIFC3

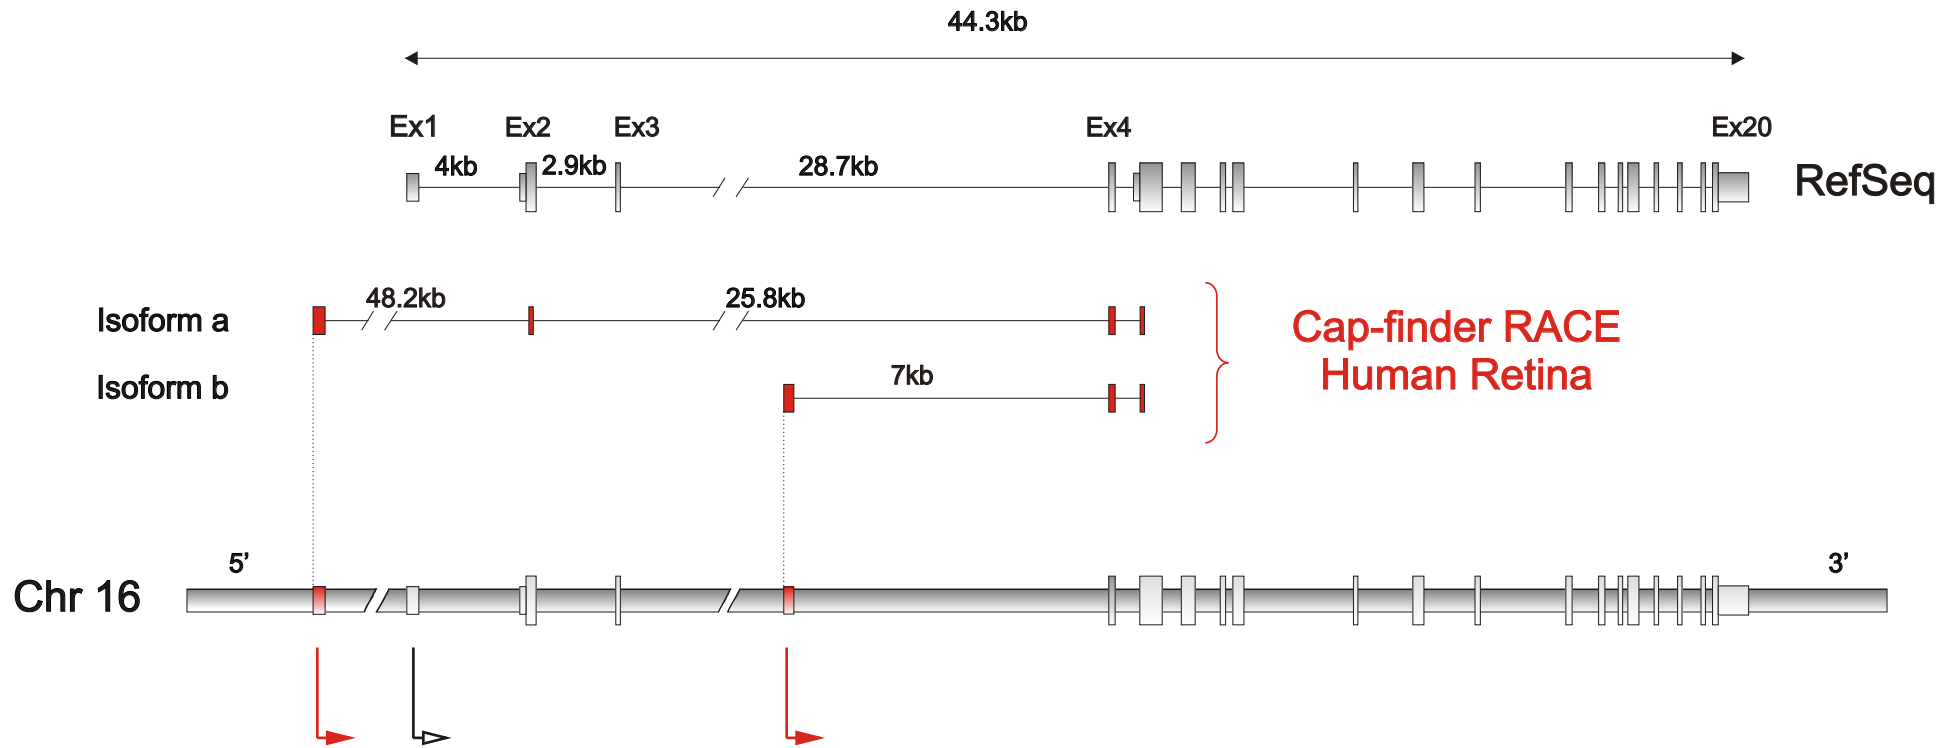

Supplement: 1471-2164-8-42-S4.pdf [file 1471-2164-8-42-S4.pdf]
